# Supplementary material for: Investigation of spontaneous emulsification and its relevance in biodiesel synthesis
Source: Royal Society of Chemistry journal article supplement (doi:10.1039/c7re00205j), 2018-01-01
Supplement: c7re00205j1.pdf [file c7re00205j1.pdf]

## Investigation of Spontaneous Emulsification and its Relevance in Biodiesel Synthesis

*Rohidas Bhoi and Sanjay Mahajani\**

Department of Chemical Engineering, Indian Institute of Technology Bombay, Mumbai-  
400076, India

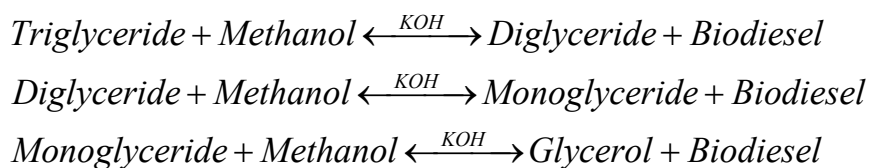

Fig. S1. Transesterification reaction.

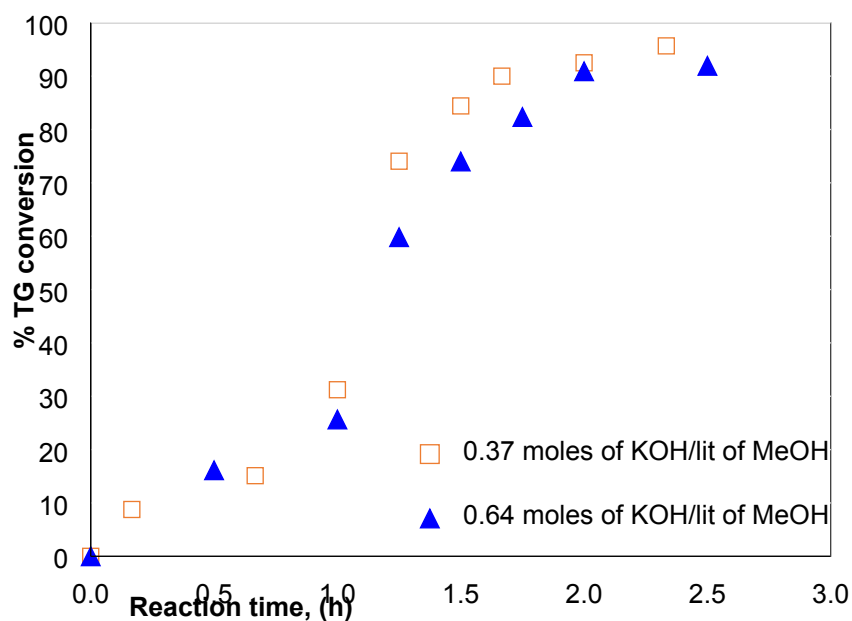

Fig S2 Effect of catalyst loading on spontaneous emulsion. Agitation speed: 100 rpm; methanol to oil mole ratio: 6:1; temperature: 60 °C
